# Supplementary material for: Acinetobacter baumannii Survival under Infection-Associated Stresses Depends on the Expression of Resistance–Nodulation–Division and Major Facilitator Superfamily Efflux Pumps
Source: MDPI journal article supplement (doi:10.3390/antibiotics13010007), 2023-12-20
Supplement: s1 [file s1]

## Supplementary information

### ***Acinetobacter baumannii* survival under infection-associated stresses depends on the expression of RND and MFS efflux pumps.**

Inga V. Leus, Marcela Olvera, Justyna W. Adamiak, Lauren Nguyen, Helen I. Zgurskaya

#### Content:

Table S1. *A. baumannii* strains and plasmids used in this study.

Table S2. Primers used in this study.

Figure S1. Expression of AmfB and AmfC proteins in *A. baumannii* IL186 and IL187 cells.

Figure S2. Growth curves of AbWT,  $\Delta 2$  and AbWT overproducing AmfAB and AmfCD pumps under indicated growth conditions.

Figure S3. Growth curves of AbWT and its RND-deficient  $\Delta 3$  cells under indicated growth conditions.

Figure S4. Growth curves of the RND-deficient  $\Delta 3$  and its derivatives lacking AmfAB, AmfCD or both pumps under indicated growth conditions.

Figure S5. Growth curves of  $\Delta 3$  overproducing AmfAB and AmfCD pumps under indicated growth conditions. Growth of  $\Delta 5$  cells is shown for comparison.

Figure S6. Growth curves of  $\Delta 5$  overproducing AmfAB and AmfCD pumps under indicated growth conditions. Growth of  $\Delta 3$  cells is shown for comparison.

Figure S7. Growth curves of AbWT, the RND-deficient  $\Delta 3$  and their derivatives lacking both AmfAB and AmfCD pumps in the M9 based medium supplemented with 0.5% sodium citrate as a sole carbon source and with or without 3.1  $\mu\text{M}$  of  $\text{FeCl}_3$ .

Figure S8. RNAseq analyses of abundances of *amfA* and *amfC* transcripts.

**Table S1. *A. baumannii* strains and plasmids used in this study.**

| Strain               | Relevant genotype                                                                                                       | Source     |
|----------------------|-------------------------------------------------------------------------------------------------------------------------|------------|
| ATCC17978            | Drug-susceptible wild type                                                                                              | ATCC       |
| JWW30 (17978 WT)     | <i>A. baumannii</i> ATCC17978 resistant to streptomycin                                                                 | [1]        |
| IL188 (WTΔAmfAB)     | JWW30 Δ <i>AIS</i> _1772-73                                                                                             | This study |
| IL189 (WTΔAmfCD)     | JWW30 Δ <i>AIS</i> _1799-1800                                                                                           | This study |
| IL190 (WTΔ2)         | IL189 Δ <i>AIS</i> _1772-73:: <i>Gm<sup>r</sup></i>                                                                     | This study |
| IL119 (AbΔ3)         | JWW30 Δ <i>adeIJK</i> Δ <i>adeAB</i> Δ <i>adeFGH</i>                                                                    | [1]        |
| IL198 (Δ3 ΔAmfAB)    | IL119 Δ <i>AIS</i> _1772-73                                                                                             | This study |
| IL199 (Δ3 ΔAmfCD)    | IL119 Δ <i>AIS</i> _1799-1800                                                                                           | This study |
| IL200 (Δ5)           | IL199 Δ <i>AIS</i> _1772-73:: <i>Gm<sup>r</sup></i>                                                                     | This study |
| IL186 (WT pAmfAB)    | JWW30 <i>attTn7</i> ::mini-Tn7T-Tp <sup>r</sup> - <i>araC</i> -P <sub>BAD</sub> - <i>ABUW</i> _1949-50 carrying pMOM101 | This study |
| IL187 (WT pAmfCD)    | JWW30 <i>attTn7</i> ::mini-Tn7T-Tp <sup>r</sup> - <i>araC</i> -P <sub>BAD</sub> - <i>ABUW</i> _1930-31 carrying pMOM102 | This study |
| MOM101 (Δ2 pAmfAB)   | IL190 <i>attTn7</i> ::mini-Tn7T-Tp <sup>r</sup> - <i>araC</i> -P <sub>BAD</sub> - <i>ABUW</i> _1949-50 carrying pMOM101 | This study |
| MOM102 (Δ2 pAmfCD)   | IL190 <i>attTn7</i> ::mini-Tn7T-Tp <sup>r</sup> - <i>araC</i> -P <sub>BAD</sub> - <i>ABUW</i> _1930-31 carrying pMOM102 | This study |
| IL194 (Δ3 pAmfAB)    | IL119 <i>attTn7</i> ::mini-Tn7T-Tp <sup>r</sup> - <i>araC</i> -P <sub>BAD</sub> - <i>ABUW</i> _1949-50 carrying pMOM101 | This study |
| IL195 (Δ3 pAmfCD)    | IL119 <i>attTn7</i> ::mini-Tn7T-Tp <sup>r</sup> - <i>araC</i> -P <sub>BAD</sub> - <i>ABUW</i> _1930-31 carrying pMOM102 | This study |
| MOM103 (Δ5 pAmfAB)   | IL200 <i>attTn7</i> ::mini-Tn7T-Tp <sup>r</sup> - <i>araC</i> -P <sub>BAD</sub> - <i>ABUW</i> _1949-50 carrying pMOM101 | This study |
| MOM104 (Δ5 pAmfCD)   | IL200 <i>attTn7</i> ::mini-Tn7T-Tp <sup>r</sup> - <i>araC</i> -P <sub>BAD</sub> - <i>ABUW</i> _1930-31 carrying pMOM102 | This study |
| Plasmids             |                                                                                                                         |            |
| pTNS3                | Amp <sup>r</sup> ; Helper plasmid encoding Tn7 transposase proteins TnsABCD from P1 and P <sub>lac</sub> promoter       | [2]        |
| pTJ1                 | pUC18T-mini-Tn7T-Tp- <i>araC</i> -P <sub>BAD</sub> -MCS, Amp <sup>r</sup> , Tp <sup>r</sup>                             | [3]        |
| pMOM101 (pTJ1-AmfAB) | pUC18T-mini-Tn7T-Tp- <i>araC</i> -P <sub>BAD</sub> - <i>ABUW</i> _1949-50, Amp <sup>r</sup> , Tp <sup>r</sup>           | This study |
| pMOM102 (pTJ1-AmfCD) | pUC18T-mini-Tn7T-Tp- <i>araC</i> -P <sub>BAD</sub> - <i>ABUW</i> _1930-31, Amp <sup>r</sup> , Tp <sup>r</sup>           | This study |
| pAT02                | pMMB67EH with Rec <sub>Ab</sub> system, Amp <sup>r</sup>                                                                | [4]        |
| pAT03                | pMMB67EH with FLP recombinase, Amp <sup>r</sup>                                                                         | [4]        |
| pMo130               | Suicide plasmid, <i>xylE</i> <sup>+</sup> , <i>sacB</i> <sup>+</sup> , Km <sup>r</sup>                                  | [5]        |

|        |                                                                                                                                                     |            |
|--------|-----------------------------------------------------------------------------------------------------------------------------------------------------|------------|
| pIL105 | pMo130 plasmid containing gentamicin-resistance cassette, Gm <sup>r</sup>                                                                           | This study |
| pIL147 | pMoΔ <i>AIS_1772-1773</i> ::Gm <sup>r</sup> containing 0.5 kb UP ( <i>AIS_1772</i> ) and 0.5 kb DOWN ( <i>AIS_1773</i> ) fragments; Gm <sup>r</sup> | This study |
| pIL148 | pMoΔ <i>AIS_1799-1800</i> ::Gm <sup>r</sup> containing 0.5 kb UP ( <i>AIS_1799</i> ) and 0.5 kb DOWN ( <i>AIS_1800</i> ) fragments; Gm <sup>r</sup> | This study |

Gm<sup>r</sup>, Tp<sup>r</sup>, Amp<sup>r</sup> genes encoding resistance to gentamicin, trimethoprim, and ampicillin respectively.

**Table S2. Primers used in this study.**

[illegible]

**Figure S1. Expression of AmfB and AmfC proteins in *A. baumannii* IL186 and IL187 cells.** Proteins were purified from the isolated membrane fractions, resolved on 12% SDS-PAGE and visualized by immunoblotting with monoclonal anti-6His antibody (Sigma).

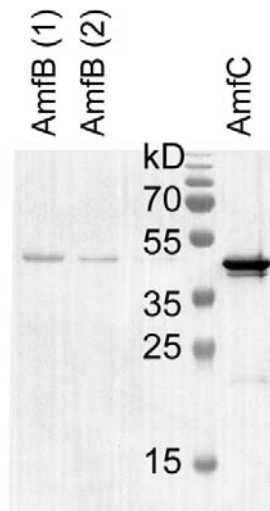

**Figure S2. Growth curves of AbWT,  $\Delta 2$  and AbWT overproducing AmfAB and AmfCD pumps under indicated growth conditions. Growth of  $\Delta 2$  cells is shown for comparison. Error bars are SD (n=3-6).**

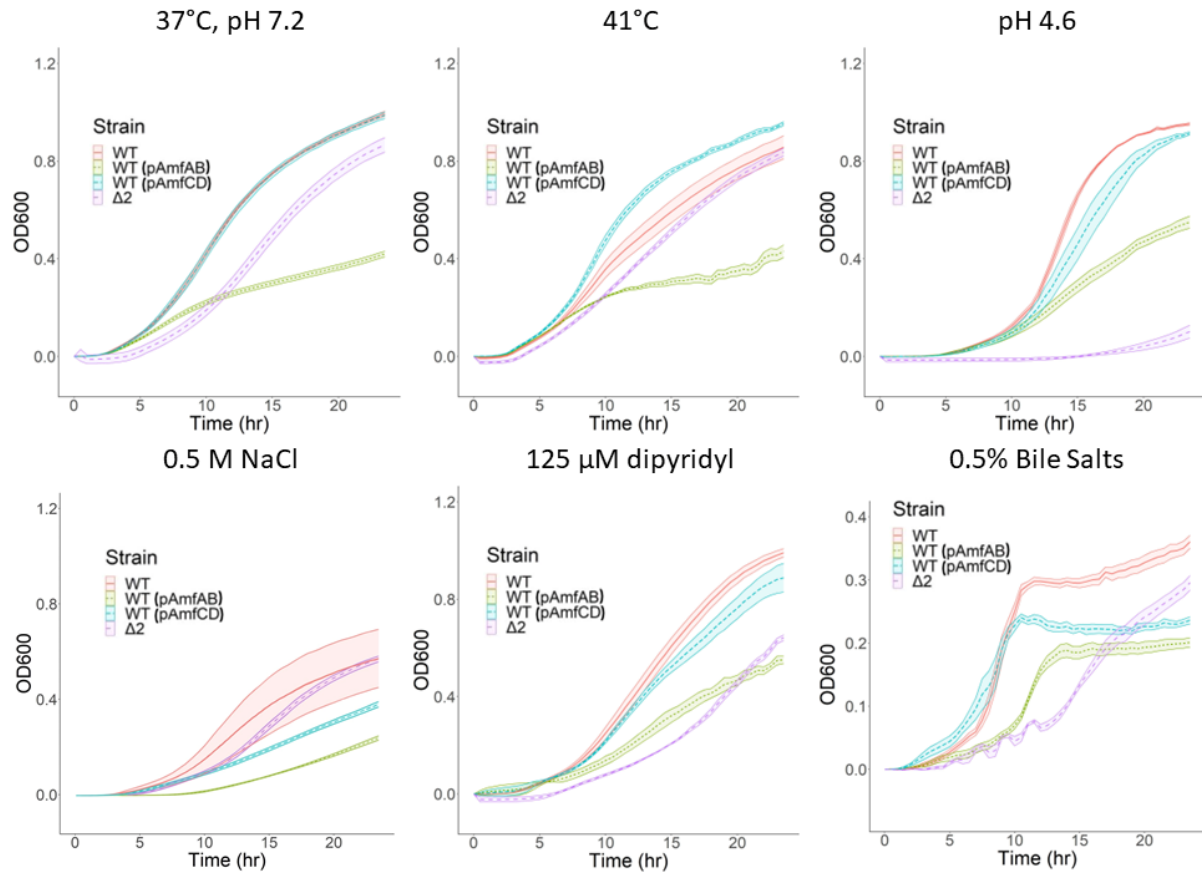

**Figure S3. Growth curves of AbWT and its RND-deficient  $\Delta 3$  cells under indicated growth conditions.** Error bars are SD (n=3-6).

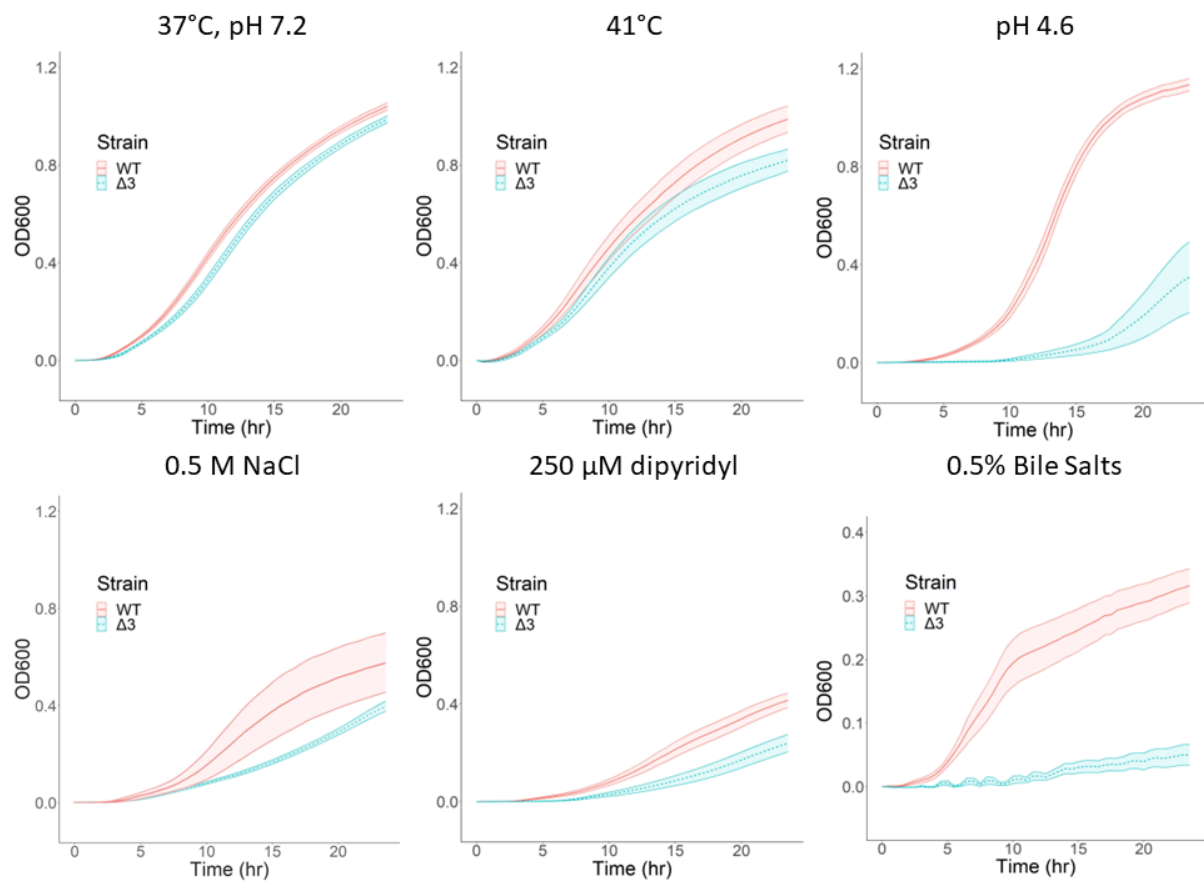

**Figure S4. Growth curves of the RND-deficient  $\Delta 3$  and its derivatives lacking AmfAB, AmfCD or both pumps under indicated growth conditions. Error bars are SD (n=3-6).**

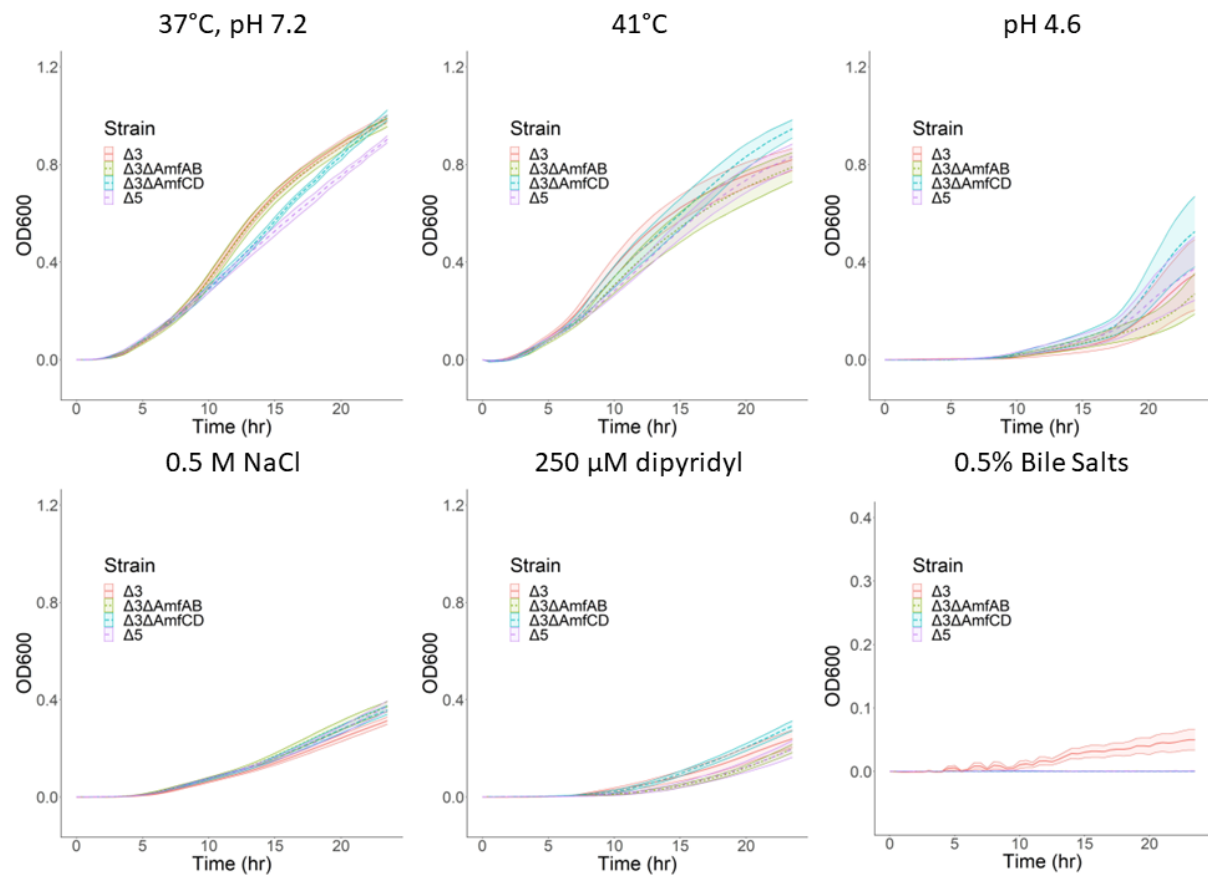



**Figure S5. Growth curves of  $\Delta 3$  overproducing AmfAB and AmfCD pumps under indicated growth conditions.** Growth of  $\Delta 5$  cells is shown for comparison. Error bars are SD (n=3-6).

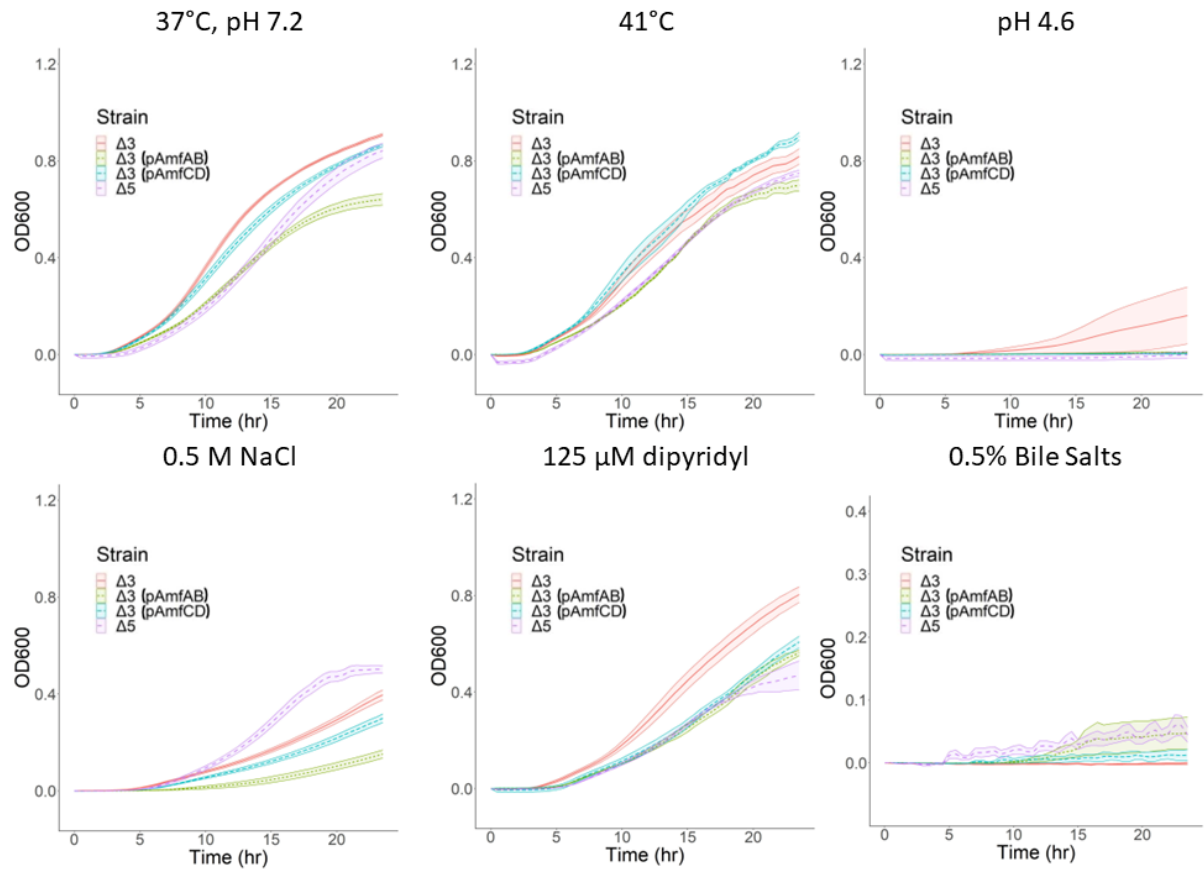

**Figure S6. Growth curves of  $\Delta 5$  overproducing AmfAB and AmfCD pumps under indicated growth conditions.** Growth of  $\Delta 3$  cells is shown for comparison. Error bars are SD (n=3-6).

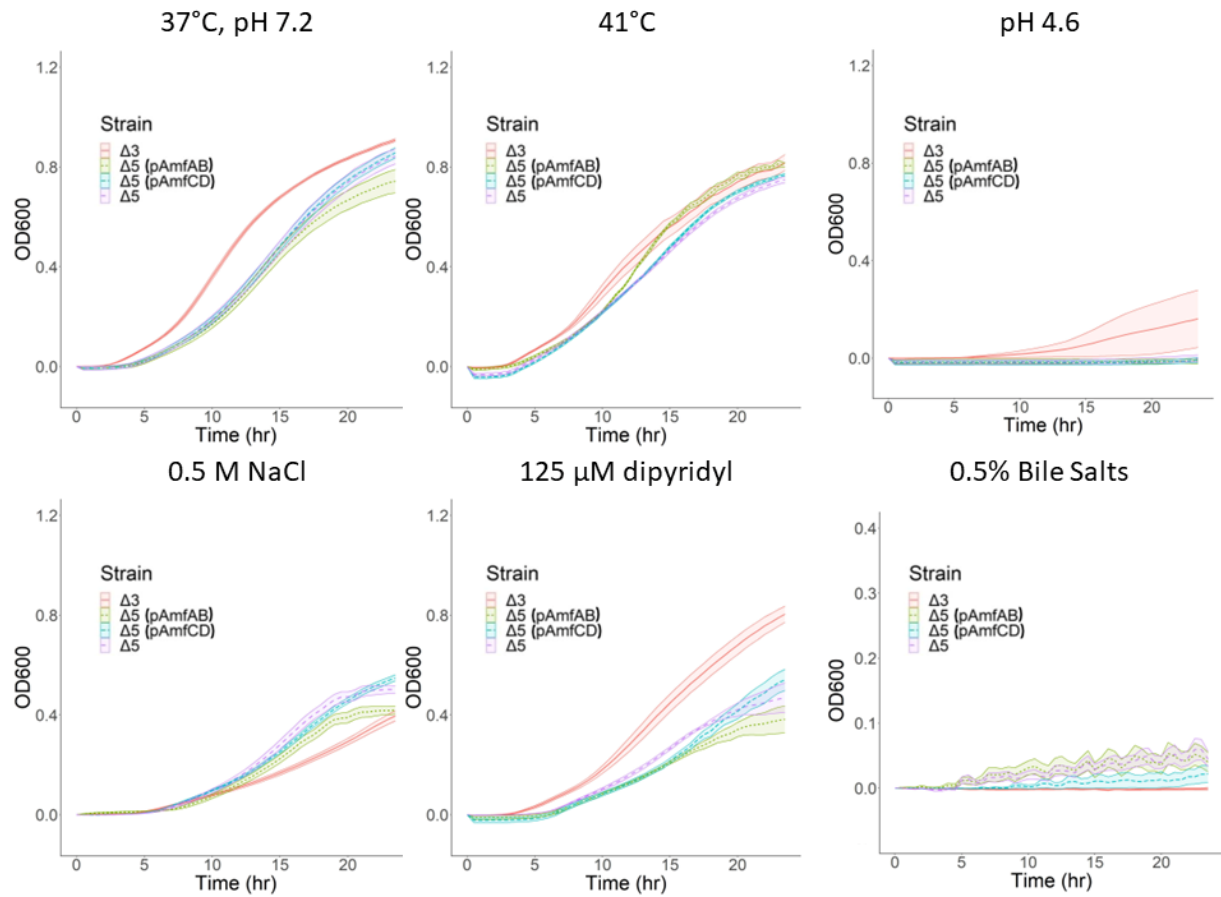

**Figure S7. Growth curves of AbWT, the RND-deficient  $\Delta 3$  and their derivatives lacking both AmfAB and AmfCD pumps.** Cells were grown in the M9 based medium supplemented with 0.5% sodium citrate as a sole carbon source and with or without 3.1  $\mu\text{M}$  of  $\text{FeCl}_3$ . Error bars are SD (n=3).

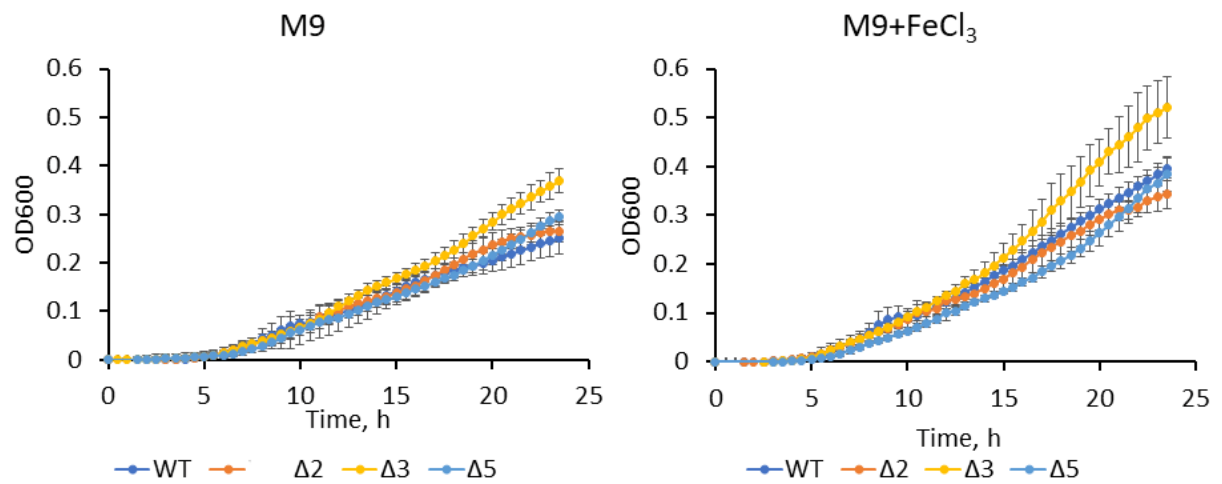

**Figure S8. RNAseq analyses of abundances of *amfA* and *amfC* transcripts.** A. Measured abundances of transcripts in AB5075 cells stressed by the indicated conditions (data from [6]). B. Changes in the abundances of transcripts in the RND-deficient AB5075 ( $\Delta$ adeIJK *adeB*::Tn –  $\Delta$ BJ) [7] and AB5075 cells stressed by the indicated conditions [6]. Ctrl – LB, 37°C, As – acidic stress, Bs – bile salt stress, Li – low iron, Oss – osmotic stress, and Tm – 41°C.

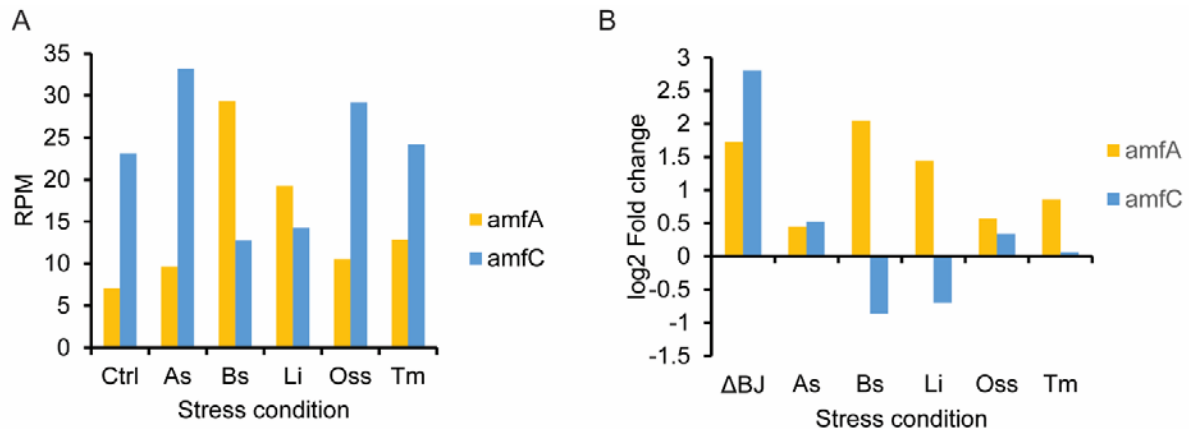

## References

1. Krishnamoorthy, G.; Leus, I.V.; Weeks, J.W.; Wolloscheck, D.; Rybenkov, V.V.; Zgurskaya, H.I. Synergy between Active Efflux and Outer Membrane Diffusion Defines Rules of Antibiotic Permeation into Gram-Negative Bacteria. *mBio* **2017**, *8*, 10.1128/mbio.01172-01117, doi:doi:10.1128/mbio.01172-17.
2. Choi, K.H.; Schweizer, H.P. mini-Tn7 insertion in bacteria with single attTn7 sites: example *Pseudomonas aeruginosa*. *Nat Protoc* **2006**, *1*, 153-161, doi:10.1038/nprot.2006.24.
3. Damron, F.H.; McKenney, E.S.; Barbier, M.; Liechti, G.W.; Schweizer, H.P.; Goldberg, J.B. Construction of Mobilizable Mini-Tn<em>7</em> Vectors for Bioluminescent Detection of Gram-Negative Bacteria and Single-Copy Promoter <em>lux</em> Reporter Analysis. *Applied and Environmental Microbiology* **2013**, *79*, 4149-4153, doi:10.1128/aem.00640-13.
4. Tucker, A.T.; Nowicki, E.M.; Boll, J.M.; Knauf, G.A.; Burdis, N.C.; Trent, M.S.; Davies, B.W. Defining gene-phenotype relationships in *Acinetobacter baumannii* through one-step chromosomal gene inactivation. *MBio* **2014**, *5*, e01313-01314, doi:10.1128/mBio.01313-14.
5. Amin, I.M.; Richmond, G.E.; Sen, P.; Koh, T.H.; Piddock, L.J.V.; Chua, K.L. A method for generating marker-less gene deletions in multidrug-resistant *Acinetobacter baumannii*. *BMC Microbiol* **2013**, *13*, 158-158, doi:10.1186/1471-2180-13-158.
6. Avican, K.; Aldandooh, J.; Togninalli, M.; Mahmud, A.; Tang, J.; Borgwardt, K.M.; Rhen, M.; Fallman, M. RNA atlas of human bacterial pathogens uncovers stress dynamics linked to infection. *NATURE COMMUNICATIONS* **2021**, *12*, doi:10.1038/s41467-021-23588-w.
7. Leus, I.V.; Adamiak, J.; Trinh, A.N.; Smith, R.D.; Smith, L.; Richardson, S.; Ernst, R.K.; Zgurskaya, H.I. Inactivation of AdeABC and AdeIJK efflux pumps elicits specific nonoverlapping transcriptional and phenotypic responses in *Acinetobacter baumannii*. *Mol Microbiol* **2020**, *144*, 1049-1065, doi:10.1111/mmi.14594.
